# Supplementary material
Source: Springer Nature journal article supplement (https://www.springermedizin.de/resource/supplementary/12889_2007_1014_MOESM1_ESM.pdf/9503128)

OR

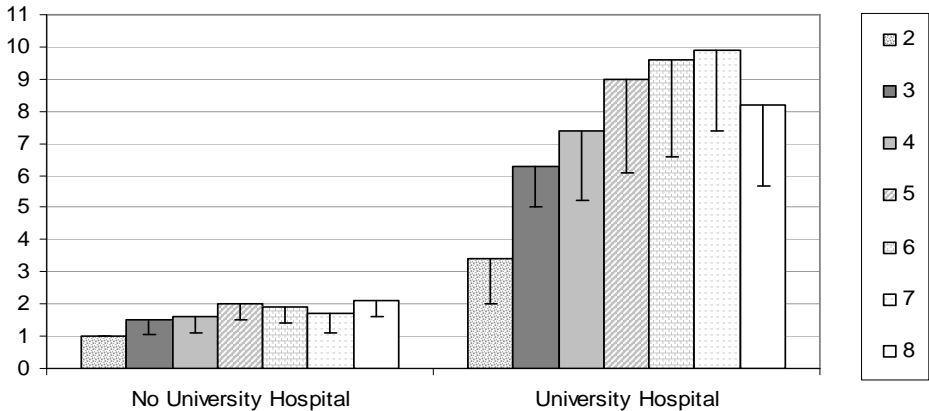

Supplement: MOESM1 [file 9503128]
